# Supplementary material for: Genetic mapping using a wheat multi-founder population reveals a locus on chromosome 2A controlling resistance to both leaf and glume blotch caused by the necrotrophic fungal pathogen Parastagonospora nodorum
Source: PubMed Central journal article supplement (PMC7021668; doi:10.1007/s00122-019-03507-w), 2020-01-29

6A

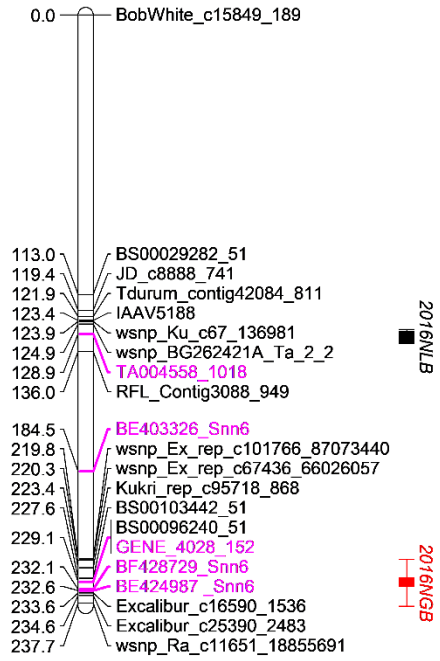

Supplement: 122_2019_3507_MOESM6_ESM.pdf [file 122_2019_3507_MOESM6_ESM.pdf]
